# Supplementary material
Source: bioRxiv or medRxiv preprint supplement (https://www.biorxiv.org/highwire/filestream/2256/field_highwire_adjunct_files/32/008862-8.pdf)

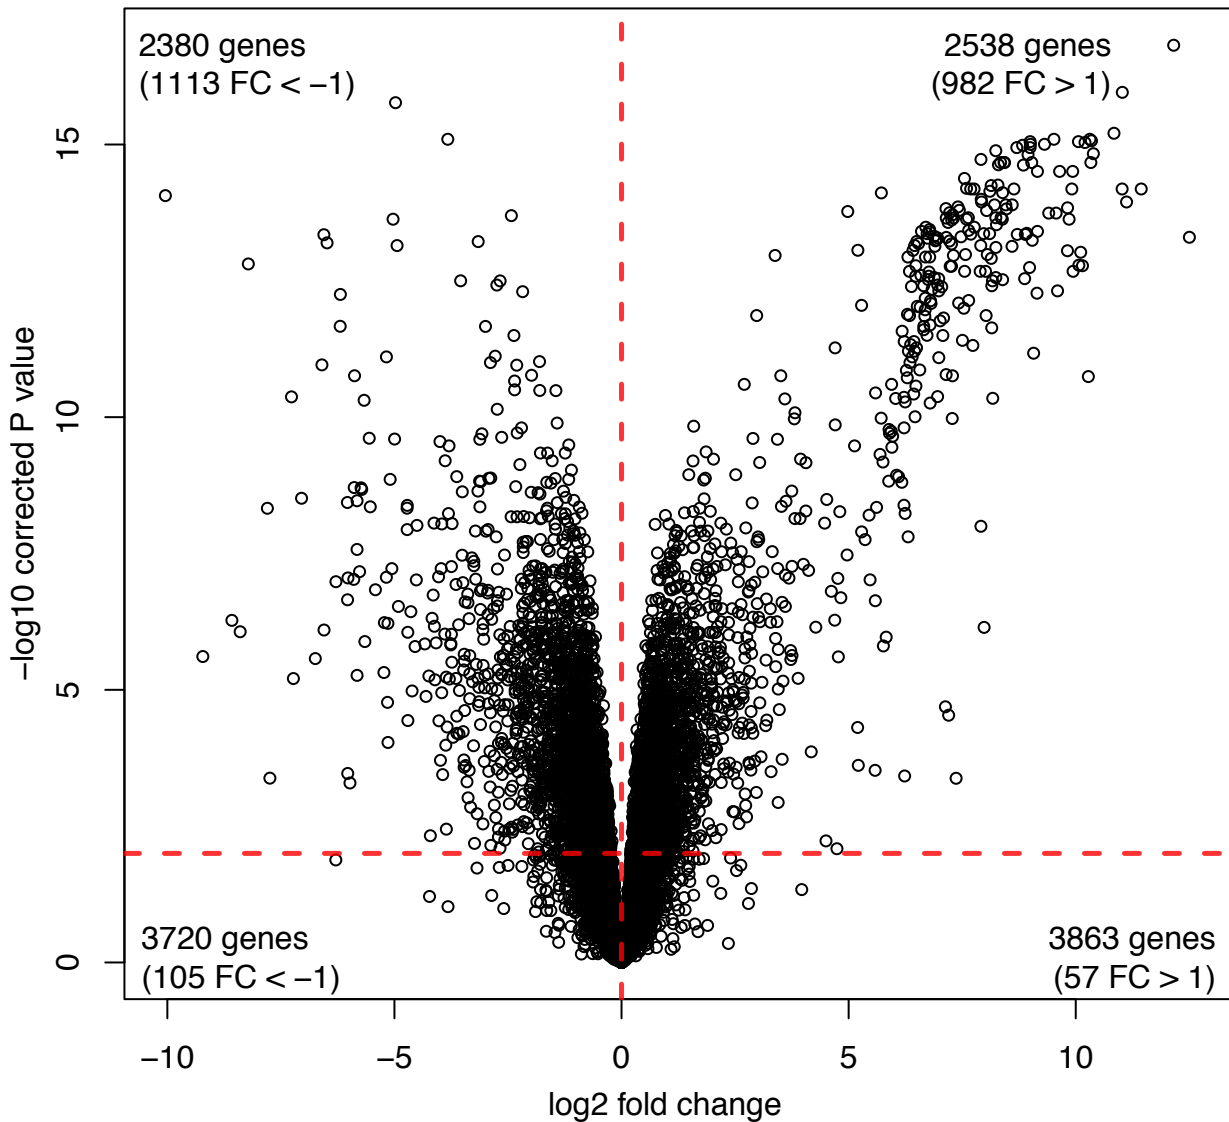

Supplement: Supplementary file [file 008862-8.pdf]
